# Supplementary material for: Phosphorus-induced activation of Ir metallene for efficient acidic overall water electrolysis
Source: Royal Society of Chemistry journal article supplement (doi:10.1039/d3cc02900j), 2023-01-01
Supplement: d3cc02900j1.pdf [file d3cc02900j1.pdf]

## **Electronic Supplementary Information for**

### **Phosphorus-induced activation of Ir metallene for efficient acidic water electrolysis**

Ziqiang Wang, Xinmiao Li, Hugang Zhang, Kai Deng, Hongjie Yu, You Xu, Xiaonian Li,

Hongjing Wang\* and Liang Wang\*

State Key Laboratory Breeding Base of Green-Chemical Synthesis Technology, College of Chemical Engineering, Zhejiang University of Technology, Hangzhou 310014, P. R. China.

**\* Corresponding authors**

\*E-mails: [hjw@zjut.edu.cn](mailto:hjw@zjut.edu.cn); [wangliang@zjut.edu.cn](mailto:wangliang@zjut.edu.cn)

## **Experimental**

### **Materials and chemicals**

Sodium hypophosphite ( $\text{NaH}_2\text{PO}_2$ ), iridium chloride hydrate ( $\text{IrCl}_3 \cdot x\text{H}_2\text{O}$ , 99.9%), formic acid ( $\text{HCOOH}$ , 88%) and Sulfuric acid ( $\text{H}_2\text{SO}_4$ , 95%~98%) were purchased from Aladdin. Trimethylstearylammmonium chloride (OTAC, 98.0%) was obtained from Tokyo Chemical Industry Co. Ltd. Nafion (5wt%) were obtained from Sigma-Aldrich. Commercial Pt/C (20wt%) was purchased from Alfa Aesar.

### **Synthesis of P-Ir metallene**

Ir metallene was first synthesized through a wet chemical reduction method. Typically, 8.0 mg of OTAC was dissolved in 1.0 mL of  $\text{IrCl}_3$  (40 mM) and 2.0 mL of deionized water under continuous sonication for 10 min, followed by adding 1.0 mL of  $\text{HCOOH}$ . Then, the mixture solution was reacted at 95 °C for 4 h. After that, dark grey products were collected by centrifugation and washing for six cycles. For phosphorus doping, 10 mg Ir metallene and 100 mg  $\text{NaH}_2\text{PO}_2$  was placed in a quartz boat, heating to 300 °C under  $\text{N}_2$  atmosphere with heating rate of 2 °C  $\text{min}^{-1}$  and reacting for 2 h. Finally, the dark grey products were collected after washing. For comparison, we synthesized P-Ir-L metallene and P-Ir-H metallene from different amounts of  $\text{NaH}_2\text{PO}_2$  under similar conditions (50 and 200 mg), respectively.

### **Characterizations**

Transmission electron microscopy (TEM, TalosS-FEG) equipped with energy dispersive X-ray spectroscopy (EDX) was used to characterize morphology and microstructure of samples. The crystalline of catalysts was analyzed by X-ray powder diffraction (XRD, Ultima IV, Rigaku, Japan).

X-ray photoelectron spectroscopy (XPS, K-Alpha) was used to analyze surface elemental composition and electronic structure of catalysts.

### **Electrochemical measurements**

HER and OER Measurements were performed by CHI660E instrument using conventional three-electrode system in 0.5 M H<sub>2</sub>SO<sub>4</sub>, in which catalyst-coated glassy carbon electrode (GCE, 0.071 cm<sup>2</sup>) as working electrode, Ag/AgCl (3M KCl) electrode as reference electrode and carbon rod as counter electrode. The obtained P-Ir metallene was ultrasonically dispersed in water to form homogeneous catalyst ink (2 mg mL<sup>-1</sup>). Prior to each measurement, catalyst ink (5 μL) was coated on polished GCE, followed by adding 3.0 μL of Nafion (0.05 wt%) to the surface to prepare the working electrode. Linear sweep voltammetry (LSV) was performed at 1 mV s<sup>-1</sup>. Electrochemical impedance spectroscopy (EIS) measurements were carried out in 0.5 M H<sub>2</sub>SO<sub>4</sub> at -0.28 V in frequency range of 0.1 Hz and 100 kHz with an amplitude of 5 mV. All potentials were converted to reversible hydrogen electrode (RHE) according to the equation  $E \text{ (RHE)} = E \text{ (Ag/AgCl)} + 0.2224 \text{ V} + 0.05916 \times \text{pH}$ . Overall water splitting was carried out in two-electrode cell under 0.5 M H<sub>2</sub>SO<sub>4</sub> using catalyst-dispersed carbon paper as both anode and cathode (1 mg cm<sup>-2</sup>).

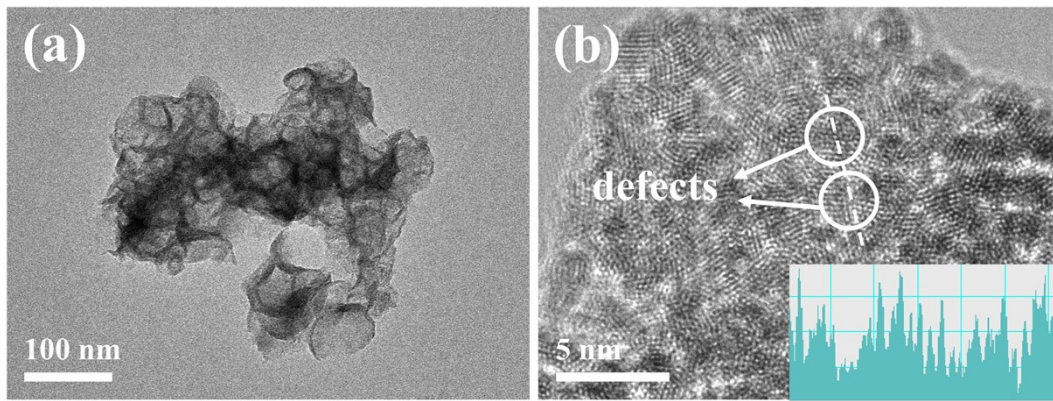

**Fig. S1** (a) TEM (b) HRTEM images of Ir metallene, and the insets in (b) illustrate the intensity profile along the line.

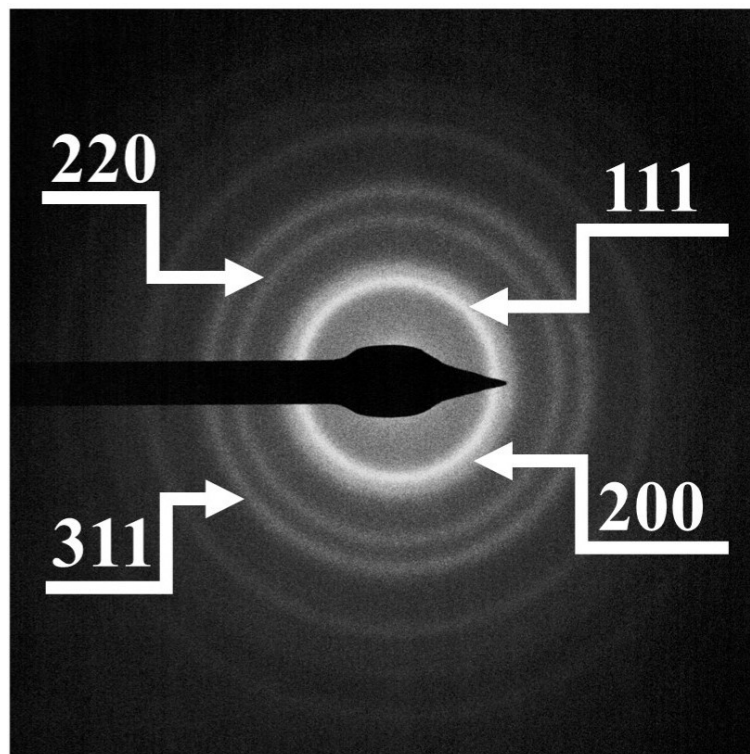

**Fig. S2** SAED pattern of P-Ir metallene.

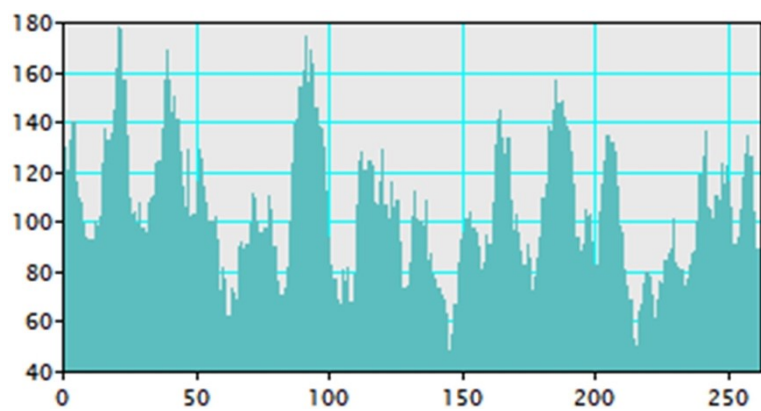

**Fig. S3** The atomic intensity map along the linear direction of P-Ir metallene.

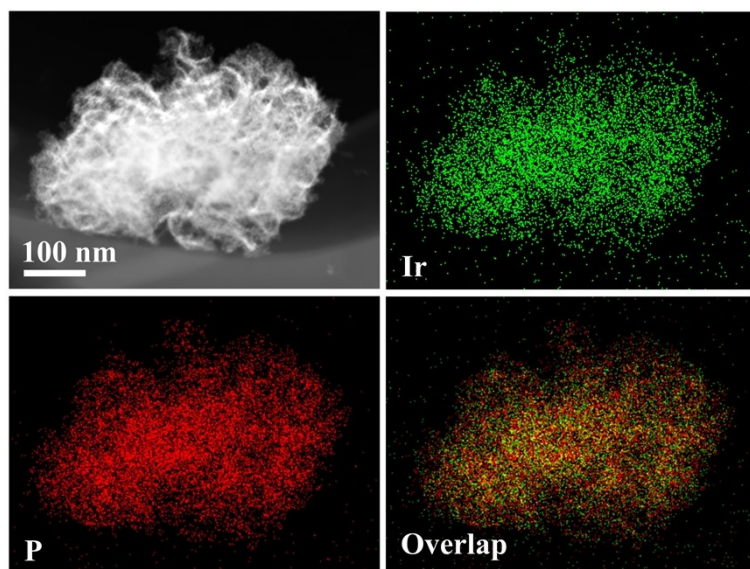

**Fig. S4** HAADF-STEM image and the corresponding EDX mapping images of P-Ir metallene.

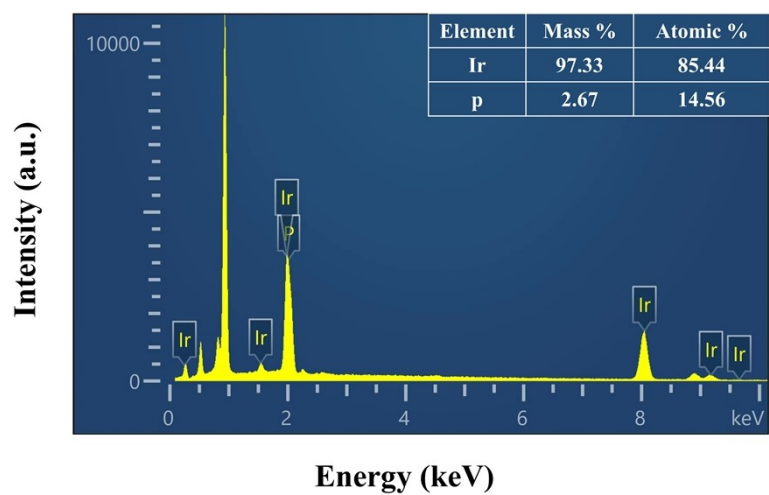

**Fig. S5** EDX spectrum of P-Ir metallene.

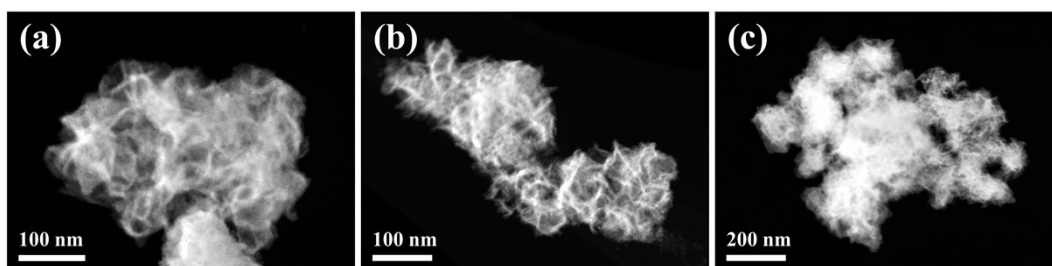

**Fig. S6** TEM images of samples prepared with different amounts of  $\text{NaH}_2\text{PO}_2$  under the typical synthesis: (a) 50 mg, (b) 100 mg and (c) 200 mg.

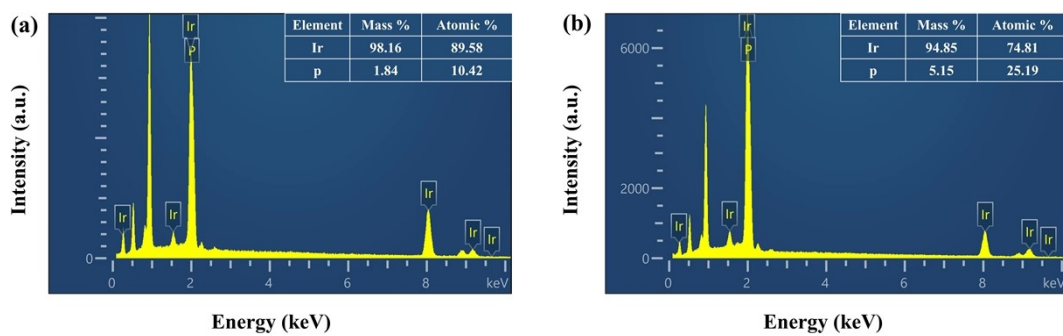

Fig. S7 EDX spectra of P-Ir-L metallene and P-Ir-H metallene.

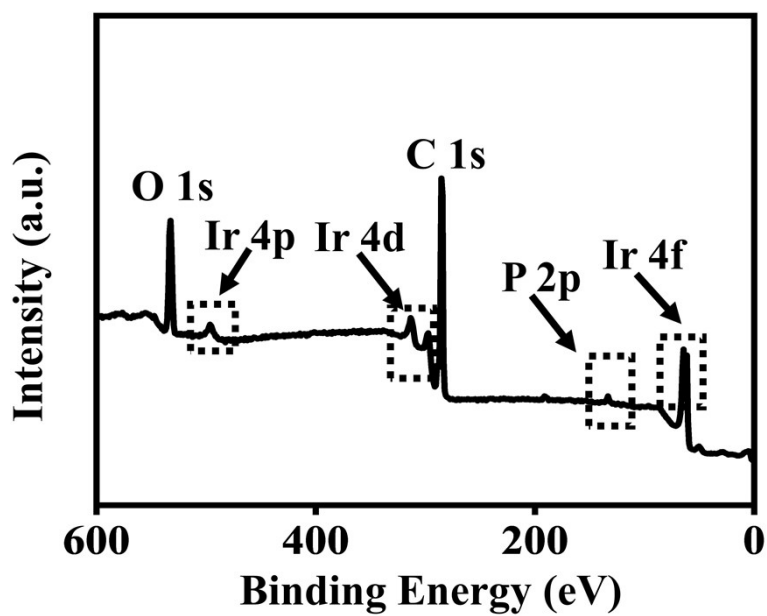

Fig. S8 XPS survey spectrum of the P-Ir metallene.

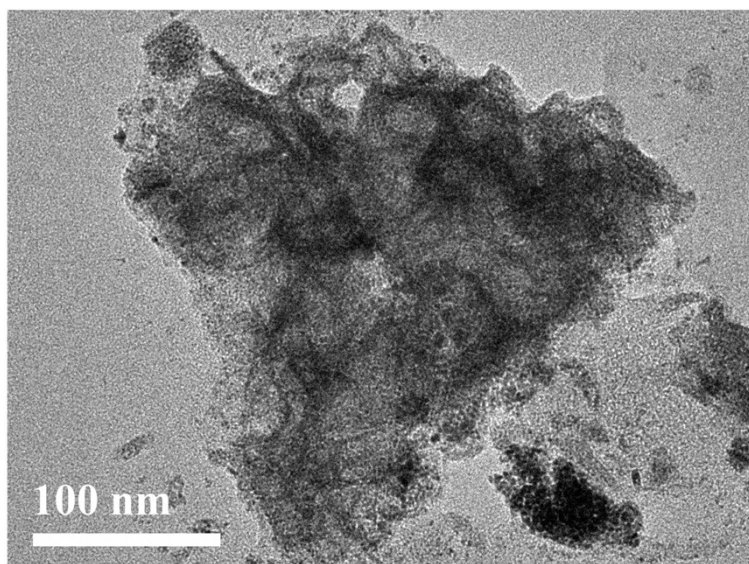

**Fig. S9** TEM image of P-Ir metallene after a long OER test.

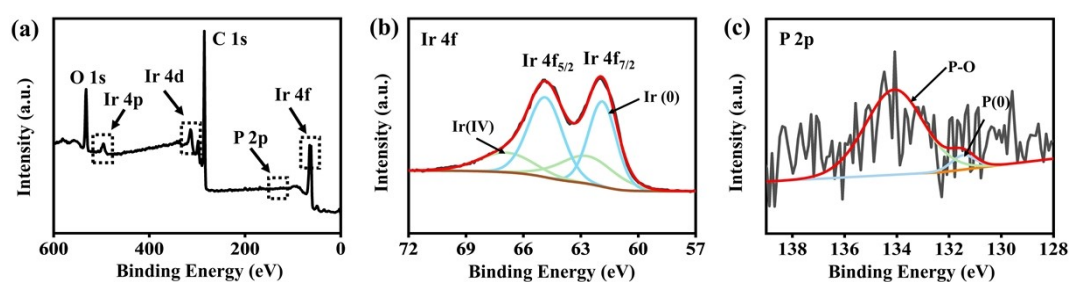

**Fig. S10** (a) XPS survey spectrum of P-Ir metallene after a long OER test. (b) XPS spectra of Ir 4f and (c) P 2p for P-Ir metallene after a long OER test.



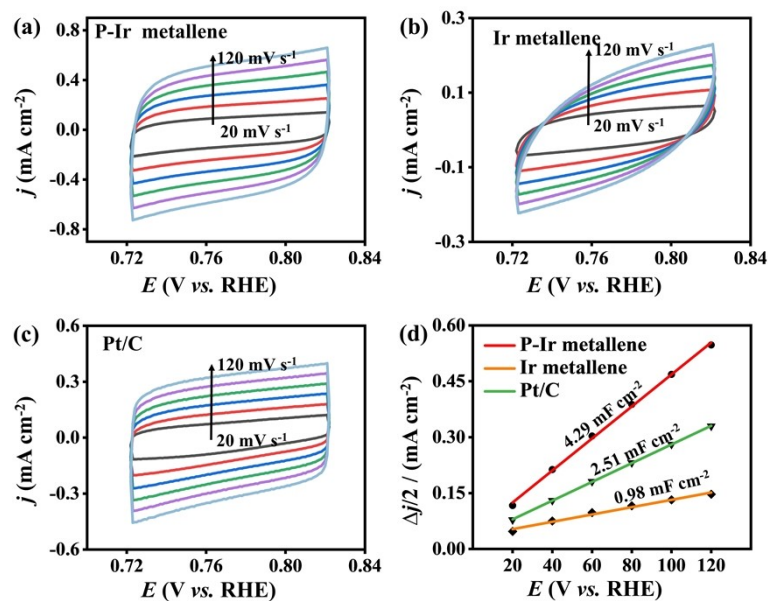

**Fig. S11** Cyclic voltammograms for (a) P-Ir metallene, (b) Ir metallene and (c) Pt/C recorded in the same potential range with increasing scan rates, and (d) corresponding capacitive current densities at 0.55 V derived.

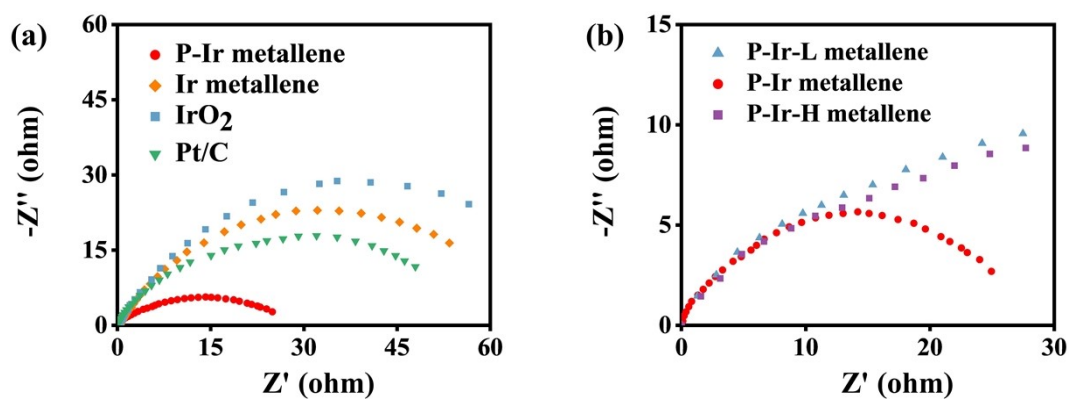

**Fig. S12** Nyquist plots for (a) P-Ir metallene, Ir metallene, IrO<sub>2</sub> and Pt/C and (b) P-Ir-L metallene, P-Ir metallene and P-Ir-H metallene recorded at -0.28 V in the frequency ranges from 100 kHz to 0.1 Hz.

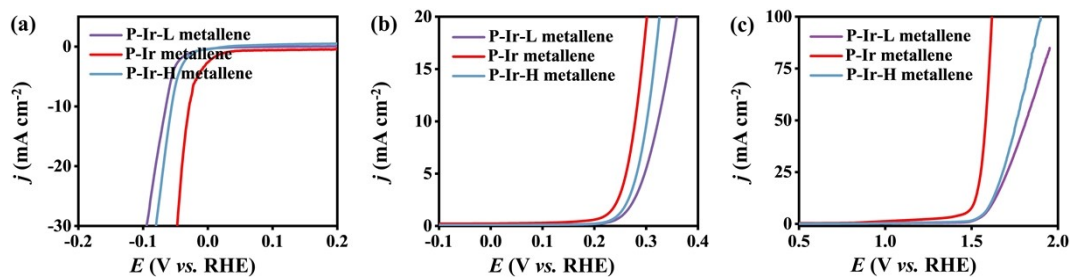

**Fig. S13** (a) HER polarization curves, (b) OER polarization curves and (c) OWS polarization curves for P-Ir-L metallene, P-Ir metallene and P-Ir-H metallene in 0.5 M H<sub>2</sub>SO<sub>4</sub>.

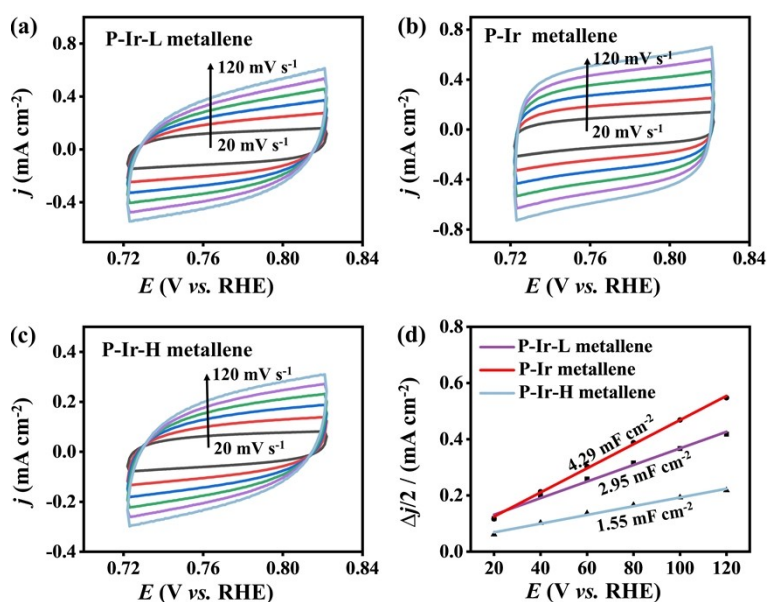

**Fig. S14** Cyclic voltammograms for (a) P-Ir-L metallene, (b) P-Ir metallene and (c) P-Ir-H metallene recorded in the same potential range with increasing scan rates, and (d) corresponding capacitive current densities at 0.55 V.

**Table S1.** The comparisons of the HER performance of P-Ir metallene with the representative reported catalysts.

| Electrocatalysts                      | Electrolytes                             | Overpotential at 10 mA cm <sup>-2</sup> (mV) | Tafel slope (mV dec <sup>-1</sup> ) | Ref.             |
|---------------------------------------|------------------------------------------|----------------------------------------------|-------------------------------------|------------------|
| <b>P-Ir metallene</b>                 | <b>0.5 M H<sub>2</sub>SO<sub>4</sub></b> | <b>28</b>                                    | <b>37</b>                           | <b>This work</b> |
| IrNi-N-C                              | 0.5 M H <sub>2</sub> SO <sub>4</sub>     | 28                                           | 38                                  | 1                |
| Ir-mCNFs                              | 0.5 M H <sub>2</sub> SO <sub>4</sub>     | 39                                           | 181                                 | 2                |
| Ir NPs/siloxene                       | 0.5 M H <sub>2</sub> SO <sub>4</sub>     | 31                                           | 29.4                                | 3                |
| Rh@Ir                                 | 0.5 M H <sub>2</sub> SO <sub>4</sub>     | 169                                          | 112                                 | 4                |
| Ir-NCNSs                              | 0.5 M H <sub>2</sub> SO <sub>4</sub>     | 46.3                                         | 52                                  | 5                |
| Co-Ir/C                               | 0.5 M H <sub>2</sub> SO <sub>4</sub>     | 44                                           | 33                                  | 6                |
| Ir/C-1                                | 0.5 M H <sub>2</sub> SO <sub>4</sub>     | 50.4                                         |                                     | 7                |
| Pd <sub>83.5</sub> Ir <sub>16.5</sub> | 0.5 M H <sub>2</sub> SO <sub>4</sub>     | 73                                           | 43.6                                | 8                |
| Ir-Au-Si                              | 0.5 M H <sub>2</sub> SO <sub>4</sub>     | 38.2                                         | 24                                  | 9                |
| Ir <sub>3</sub> -CoP / CC             | 0.5 M H <sub>2</sub> SO <sub>4</sub>     | 38                                           | 48                                  | 10               |

**Table S2.** The comparisons of the OER performance of P-Ir metallene with the representative reported catalysts.

| Electrocatalysts                                            | Electrolytes                         | Overpotential at 10 mA cm <sup>-2</sup> (mV) | Tafel slope (mV dec <sup>-1</sup> ) | Ref.             |
|-------------------------------------------------------------|--------------------------------------|----------------------------------------------|-------------------------------------|------------------|
| P-Ir metallene                                              | 0.5 M H <sub>2</sub> SO <sub>4</sub> | 279                                          | 63                                  | <b>This work</b> |
| Pt <sub>70</sub> Ru <sub>15</sub> Ir <sub>15</sub>          | 0.5 M H <sub>2</sub> SO <sub>4</sub> | 450                                          | 118                                 | 11               |
| IrRu <sub>x</sub> @Ir                                       | 0.5 M H <sub>2</sub> SO <sub>4</sub> | 288                                          | 66.2                                | 12               |
| Au/Ir NCs                                                   | 0.5 M H <sub>2</sub> SO <sub>4</sub> | 300                                          | 52.94                               | 13               |
| Ir/g-C <sub>3</sub> N <sub>4</sub> /NG                      | 0.5 M H <sub>2</sub> SO <sub>4</sub> | 287                                          | 72.8                                | 14               |
| FeCoNiIrRu/CNFs                                             | 0.5 M H <sub>2</sub> SO <sub>4</sub> | 280                                          | 154                                 | 15               |
| IrCo-N-C                                                    | 0.5 M H <sub>2</sub> SO <sub>4</sub> | 340                                          | 79                                  | 16               |
| PdCu/Ir/C                                                   | 0.1 M HClO <sub>4</sub>              | 283                                          | 59.6                                | 17               |
| Ir <sub>3</sub> CeO <sub>x</sub> /C                         | 0.1 M HClO <sub>4</sub>              | 299                                          | 49                                  | 18               |
| Pt-Ir-Pd                                                    | 0.5 M H <sub>2</sub> SO <sub>4</sub> | 408                                          | 128.7                               | 19               |
| Pt <sub>62</sub> Co <sub>23</sub> /Ir <sub>15</sub> FBNWs/C | 0.1 M HClO <sub>4</sub>              | 308                                          |                                     | 20               |

**Table S3.** The comparisons of the OWS performance of P-Ir metallene with the representative reported catalysts.

| Electrocatalysts                     | Electrolytes                         | Voltage at 10 mA cm <sup>-2</sup><br>(V) | Ref.             |
|--------------------------------------|--------------------------------------|------------------------------------------|------------------|
| P-Ir metallene                       | 0.5 M H <sub>2</sub> SO <sub>4</sub> | 1.5                                      | <b>This work</b> |
| Au@AuIr <sub>2</sub>                 | 0.5 M H <sub>2</sub> SO <sub>4</sub> | 1.55                                     | 21               |
| Ir <sub>2</sub> Ni/C                 | 0.5 M H <sub>2</sub> SO <sub>4</sub> | 1.597                                    | 22               |
| IrCo@NCNT/PC                         | 0.5 M H <sub>2</sub> SO <sub>4</sub> | 1.51                                     | 23               |
| IrTe NTs                             | 0.5 M H <sub>2</sub> SO <sub>4</sub> | 1.53                                     | 24               |
| Ir/Fe@NCNT                           | 0.5 M H <sub>2</sub> SO <sub>4</sub> | 1.52                                     | 25               |
| Ir-doped WO <sub>3</sub>             | 0.5 M H <sub>2</sub> SO <sub>4</sub> | 1.56                                     | 26               |
| Ir-NSs                               | 0.5 M H <sub>2</sub> SO <sub>4</sub> | 1.586                                    | 27               |
| RuIrTe NTs                           | 0.5 M H <sub>2</sub> SO <sub>4</sub> | 1.511                                    | 28               |
| Ir <sub>1</sub> Co <sub>1</sub> HNPs | 0.5 M H <sub>2</sub> SO <sub>4</sub> | 1.52                                     | 29               |
| AuIr @ CNT                           | 0.5 M H <sub>2</sub> SO <sub>4</sub> | 1.51                                     | 30               |

## References

1. D. Liu, Y. Zhao, C. Wu, W. Xu, S. Xi, M. Chen, L. Yang, Y. Zhou, Q. He, X. Li, B. Ge, L. Song, J. Jiang and Q. Yan, *Nano Energy*, 2022, **98**, 107296.
2. R. He, Y. Yang, P. Yang, X. Zhao, J. Zhu, R. Yang, Q. Huang and L. Yang, *Chem. Phys.*, 2022, **554**, 111403.
3. Q. Dai, Q. Meng, C. Du, F. Ding, J. Huang, J. Nie, X. Zhang and J. Chen, *Chem. Commun.*, 2020, **56**, 4824-4827.
4. Y. Zou, R. Goei, S.-A. Ong, A. J. Ong, J. Huang and A. I. Y. Tok, *Processes*, 2022, **10**, 10051008.
5. X. Wu, Z. Wang, K. Chen, Z. Li, B. Hu, L. Wang and M. Wu, *ACS Appl. Mater. Interfaces*, 2021, **13**, 22448-22456.
6. X. Zhang, Y. Fan, W. Zhang, L. Tang and J. Guo, *Surf. Interfaces*, 2021, **24**, 101049.
7. W. Cao, Y. Xu, Z. Wang, J. Luo, M. A. Khan, L. Zhang, D. Ye, H. Zhao and J. Zhang, *J. Electrochem. Soc.*, 2020, **167**, 104511.
8. C. Wang, H. Xu, H. Shang, L. Jin, C. Chen, Y. Wang, M. Yuan and Y. Du, *Inorg. Chem.*, 2020, **59**, 3321-3329.
9. F. Liao, B. Jiang, W. Shen, Y. Chen, Y. Li, Y. Shen, K. Yin and M. Shao, *ChemCatChem*, 2019, **11**, 2126-2130.
10. Y. Tong and P. Chen, *Dalton Trans.*, 2021, **50**, 7364-7371.
11. S. Ravichandran, N. Bhuvanendran, Q. Xu, T. Maiyalagan, L. Xing and H. Su, *J. Colloid Interface Sci.*, 2022, **608**, 207-218.
12. Y. Zheng, F. Zhang, G. Wang, D. Lai, L. Zou, Q. Cheng, J. Li, Z. Zou and H. Yang, *J. Power*

*Sources*, 2022, **528**, 231189.

13. Z. Ke, L. Li, Q. Jia, Y. Yang and H. Cui, *Appl. Surf. Sci.*, 2019, **463**, 58-65.
14. B. Jiang, T. Wang, Y. Cheng, F. Liao, K. Wu and M. Shao, *ACS Appl. Mater. Interfaces*, 2018, **10**, 39161-39167.
15. H. Zhu, Z. Zhu, J. Hao, S. Sun, S. Lu, C. Wang, P. Ma, W. Dong and M. Du, *Chem. Eng. J.*, 2022, **431**, 133251.
16. M. Xiao, J. Zhu, S. Li, G. Li, W. Liu, Y.-P. Deng, Z. Bai, L. Ma, M. Feng, T. Wu, D. Su, J. Lu, A. Yu and Z. Chen, *ACS Catal.*, 2021, **11**, 8837-8846.
17. M. Li, Z. Zhao, Z. Xia, M. Luo, Q. Zhang, Y. Qin, L. Tao, K. Yin, Y. Chao, L. Gu, W. Yang, Y. Yu, G. Lu and S. Guo, *Angew. Chem., Int. Ed.*, 2021, **60**, 8243-8250.
18. X. Zhao, Y. Chang, X. He, H. Zhang, J. Jia and M. Jia, *J. Rare Earths*, 2022, **41**, 208-214.
19. J. Zhu, M. Xie, Z. Chen, Z. Lyu, M. Chi, W. Jin and Y. Xia, *Adv. Energy Mater.*, 2020, **10**, 1904114.
20. Y. Sun, B. Huang, Y. Li, Y. Xing, M. Luo, N. Li, Z. Xia, Y. Qin, D. Su, L. Wang and S. Guo, *Chem. Mater.*, 2019, **31**, 8136-8144.
21. H. Wang, Z. N. Chen, D. Wu, M. Cao, F. Sun, H. Zhang, H. You, W. Zhuang and R. Cao, *J. Am. Chem. Soc.*, 2021, **143**, 4639-4645.
22. X. Zhao, Y. Chang, J. Ji, J. Jia and M. Jia, *RSC Adv.*, 2021, **11**, 33179-33185.
23. D. Zhao, Y. Zhu, Q. Wu, W. Zhou, J. Dan, H. Zhu, W. Lei, L.-J. Ma and L. Li, *Chem. Eng. J.*, 2022, **430**, 132825.
24. Z. Wang, P. Wang, H. Zhang, W. Tian, Y. Xu, X. Li, L. Wang and H. Wang, *J. Mater. Chem. A*, 2021, **9**, 18576-18581.

25. Z. Zhang, Y. Xia, M. Ye, D. Wen, W. Zhang, W. Peng, L. Tian and W. Hu, *Int. J. Hydrogen Energy*, 2022, **47**, 13371-13385.
26. P. Li, X. Duan, Y. Kuang and X. Sun, *Small*, 2021, **17**, 2102078.
27. Z. Cheng, B. Huang, Y. Pi, L. Li, Q. Shao and X. Huang, *Natl. Sci. Rev.*, 2020, **7**, 1340-1348.
28. M. Liu, S. Liu, Q. Mao, S. Yin, Z. Wang, Y. Xu, X. Li, L. Wang and H. Wang, *J. Mater. Chem. A*, 2022, **10**, 2021-2026.
29. Y. Li, L. Xing, D. Yu, A. Libanori, K. Yang, J. Sun, A. Nashalian, Z. Zhu, Z. Ma, Y. Zhai and J. Chen, *ACS Appl. Nano Mater.*, 2020, **3**, 11916-11922.
30. H. Hu, F. M. D. Kazim, Z. Ye, Y. Xie, Q. Zhang, K. Qu, J. Xu, W. Cai, S. Xiao and Z. Yang, *J. Mater. Chem. A*, 2020, **8**, 20168-20174.
